# Supplementary material
Source: PubMed Central journal article supplement (PMC3702404)
Supplement: NIHMS52911-supplement-1.pdf [file NIHMS52911-supplement-1.pdf]

## **Supplementary Information**

for

### **A ternary AppA–PpsR–DNA complex mediates light-regulation of photosynthesis-related gene expression**

Andreas Winkler<sup>1</sup>, Udo Heintz<sup>1</sup>, Robert Lindner<sup>1</sup>, Jochen Reinstein<sup>1</sup>, Robert Shoeman<sup>1</sup> & Ilme Schlichting<sup>1</sup>

<sup>1</sup>Department of Biomolecular Mechanisms, Max Planck Institute for Medical Research, Heidelberg, Germany. Correspondence should be addressed to A.W. ([Andreas.Winkler@mpimf-heidelberg.mpg.de](mailto:Andreas.Winkler@mpimf-heidelberg.mpg.de))

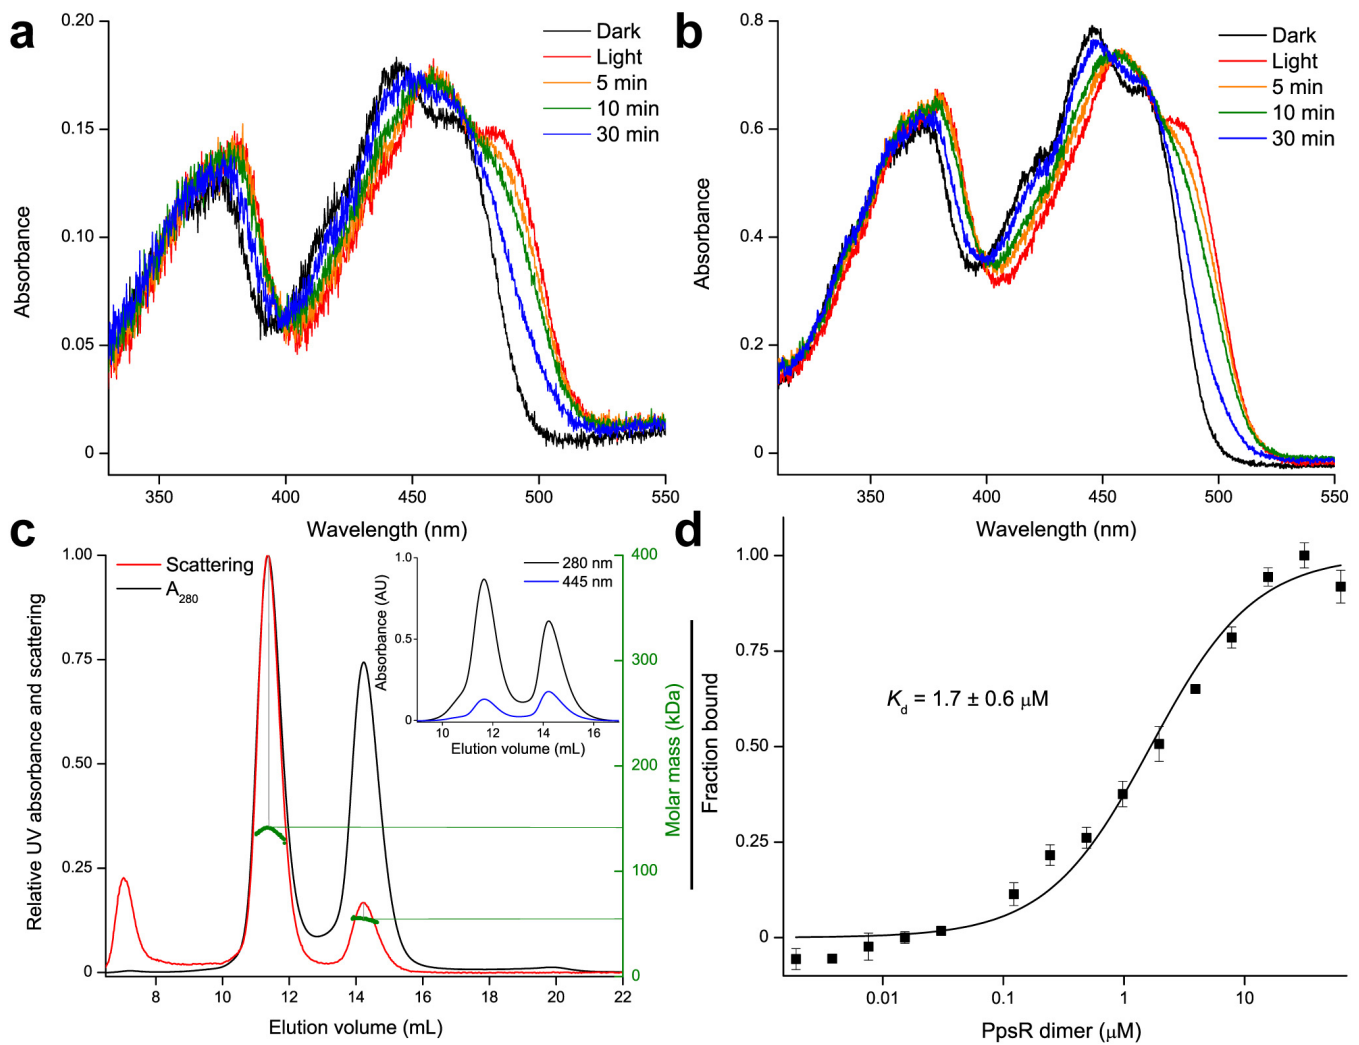

**Supplementary Figure 1.** Comparison of photocycles of AppA variants and their complex formation with PpsR. **(a,b)** Both AppA variants (panel **a** – full-length AppA wild-type and panel **b** – AppA $\Delta$ C) are characterized by a 17 nm red-shift in the absorption spectrum upon blue-light absorption. The calculated dark-state recovery rate constants correspond to  $5 \pm 1 \text{ s}^{-1}$  and  $6 \pm 1 \text{ s}^{-1}$  for wild-type and AppA $\Delta$ C, respectively (in 10 mM CHES pH 8.5, 500 mM NaCl and 5 % glycerol; 20 °C). Recovery times after illumination of individual traces are provided in the insets. Experimental details are provided in the Supplementary Note. **(c)** Elution profile of PpsR incubated with 2-fold excess of AppA $\Delta$ C on a Superdex 200 10/300 GL column. Static-light scattering detection provided an experimentally determined molecular mass for the complex of  $139 \pm 5 \text{ kDa}$  which agrees well with the theoretical value of 147 kDa (AppA $\Delta$ C–PpsR $_2$ ). The inset shows the UV absorbance traces at 280 and 445 nm. The extracted relative ratios of  $A_{280}/A_{445}$  of 6.63 and 3.44 correspond to theoretical values of 6.61 and 3.37 for the AppA $\Delta$ C–PpsR $_2$  complex and AppA alone, respectively, confirming the 1:2 stoichiometry<sup>1</sup>. **(d)** Titration of NT-647 labeled full-length AppA C20S with PpsR. Error bars correspond to the standard deviation of MST measurements performed in triplicate. Due to the aggregation tendency of full-length AppA a subtle linear trend overlays the binding curve. This trend is also seen in fluorescence scans of labeled AppA alone but has a negligible effect on the determined  $K_d$  of  $1.7 \mu\text{M}$  calculated for a PpsR dimer as binding partner.

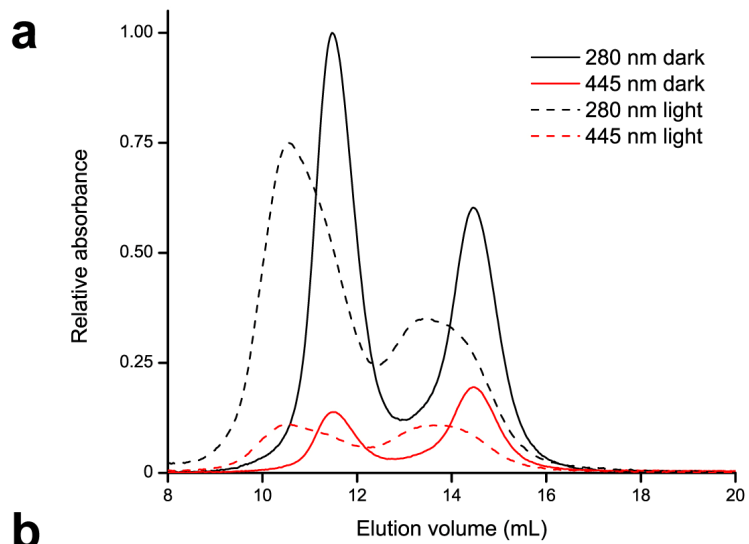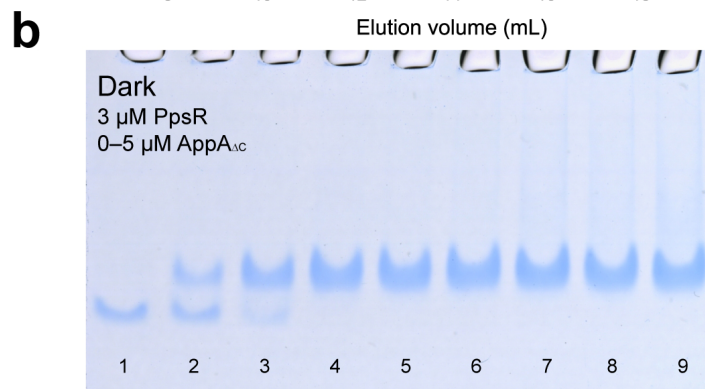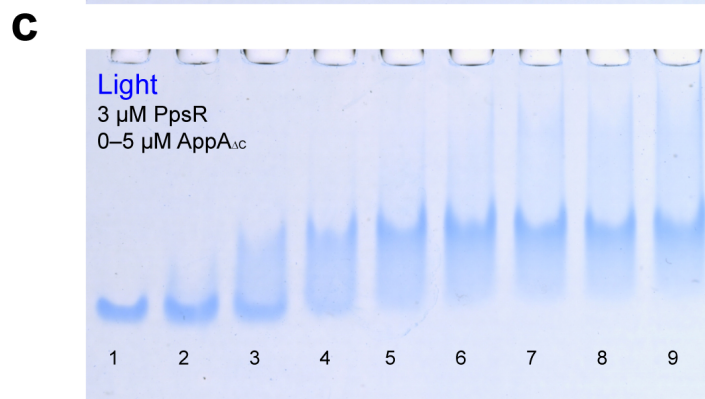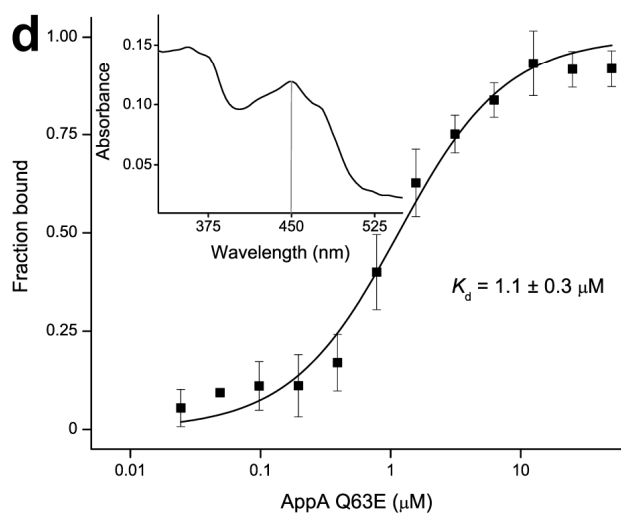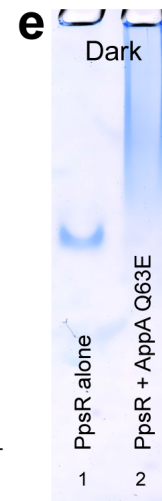

**Supplementary Figure 2.** Blue-light effect on the binary AppA $_{\Delta C}$ -PpsR $_2$  complex. **(a)** Gel fractionation of AppA $_{\Delta C}$ -PpsR $_2$  after 15 min incubation of 8  $\mu$ M AppA $_{\Delta C}$  and PpsR in a total volume of 500  $\mu$ L in the dark (straight lines, black – 280 nm, red – 445nm). To address the influence of light (dashed lines, same colors) AppA $_{\Delta C}$  was pre-irradiated with blue-light for 5 min at 600  $\mu$ W cm $^{-2}$  and illumination continued during the incubation time with PpsR. Blue-light irradiation of the gel filtration column was performed throughout the run-time. The observed changes in the elution volume are indicative of structural rearrangements and MALS detection suggested a light-induced dimer formation for AppA $_{\Delta C}$ . For the complex species, however, no appreciable change in molar mass was observed. **(b,c)** Native PAGE experiments (6 % TGE gels) showing the titration of 3  $\mu$ M PpsR with increasing concentrations of AppA $_{\Delta C}$  under dark **(b)** and blue-light **(c)** conditions. Semi-quantitative evaluation of the AppA $_{\Delta C}$ -PpsR $_2$  complex formation by integration of free PpsR signal intensities in Coomassie-stained gels is presented in Figure 2a. The structural change of the complex species indicated in panel **a** can also be seen in the slower migration of the complex species in the illuminated gel. In contrast to PpsR, AppA $_{\Delta C}$  does not form a discrete band in native PAGE but produces a faint smear above the protein complex band. This region also shows substantially retarded mobility upon illumination in line with AppA's light induced conformational change. Lanes 1–9 – 0, 0.75, 1.5, 2.25, 3, 3.5, 4, 4.5, 5  $\mu$ M AppA $_{\Delta C}$ . **(d)** Measurement of the thermophoretic mobility of NT-647 labeled PpsR upon titration with AppA Q63E  $\Delta$ 399 that is locked in the light-activated state<sup>2,3</sup>. A  $K_d$  of 1.1  $\mu$ M, closely resembling that of AppA $_{\Delta C}$ , was obtained after averaging three measurements (error bars correspond to the standard deviation). The inset shows the characteristic partially red-shifted absorbance spectrum of the AppA variant with a maximum at 450 nm (445 nm for wild-type). **(e)** Interaction of PpsR with the light-state locked AppA Q63E variant visualized by native PAGE (6 % TGE). Interestingly, AppA Q63E  $\Delta$ 399 bound to PpsR forms a smeared band on the gel, analogous to the AppA $_{\Delta C}$ -PpsR $_2$  complex under blue-light conditions (Supplementary Fig. 3f). The increased smearing of this complex species originates from the fact that this gel was run at RT. Lane 1 – 2.8  $\mu$ M PpsR and lane 2 – 2.8  $\mu$ M PpsR in the presence of 5  $\mu$ M AppA Q63E  $\Delta$ 399.

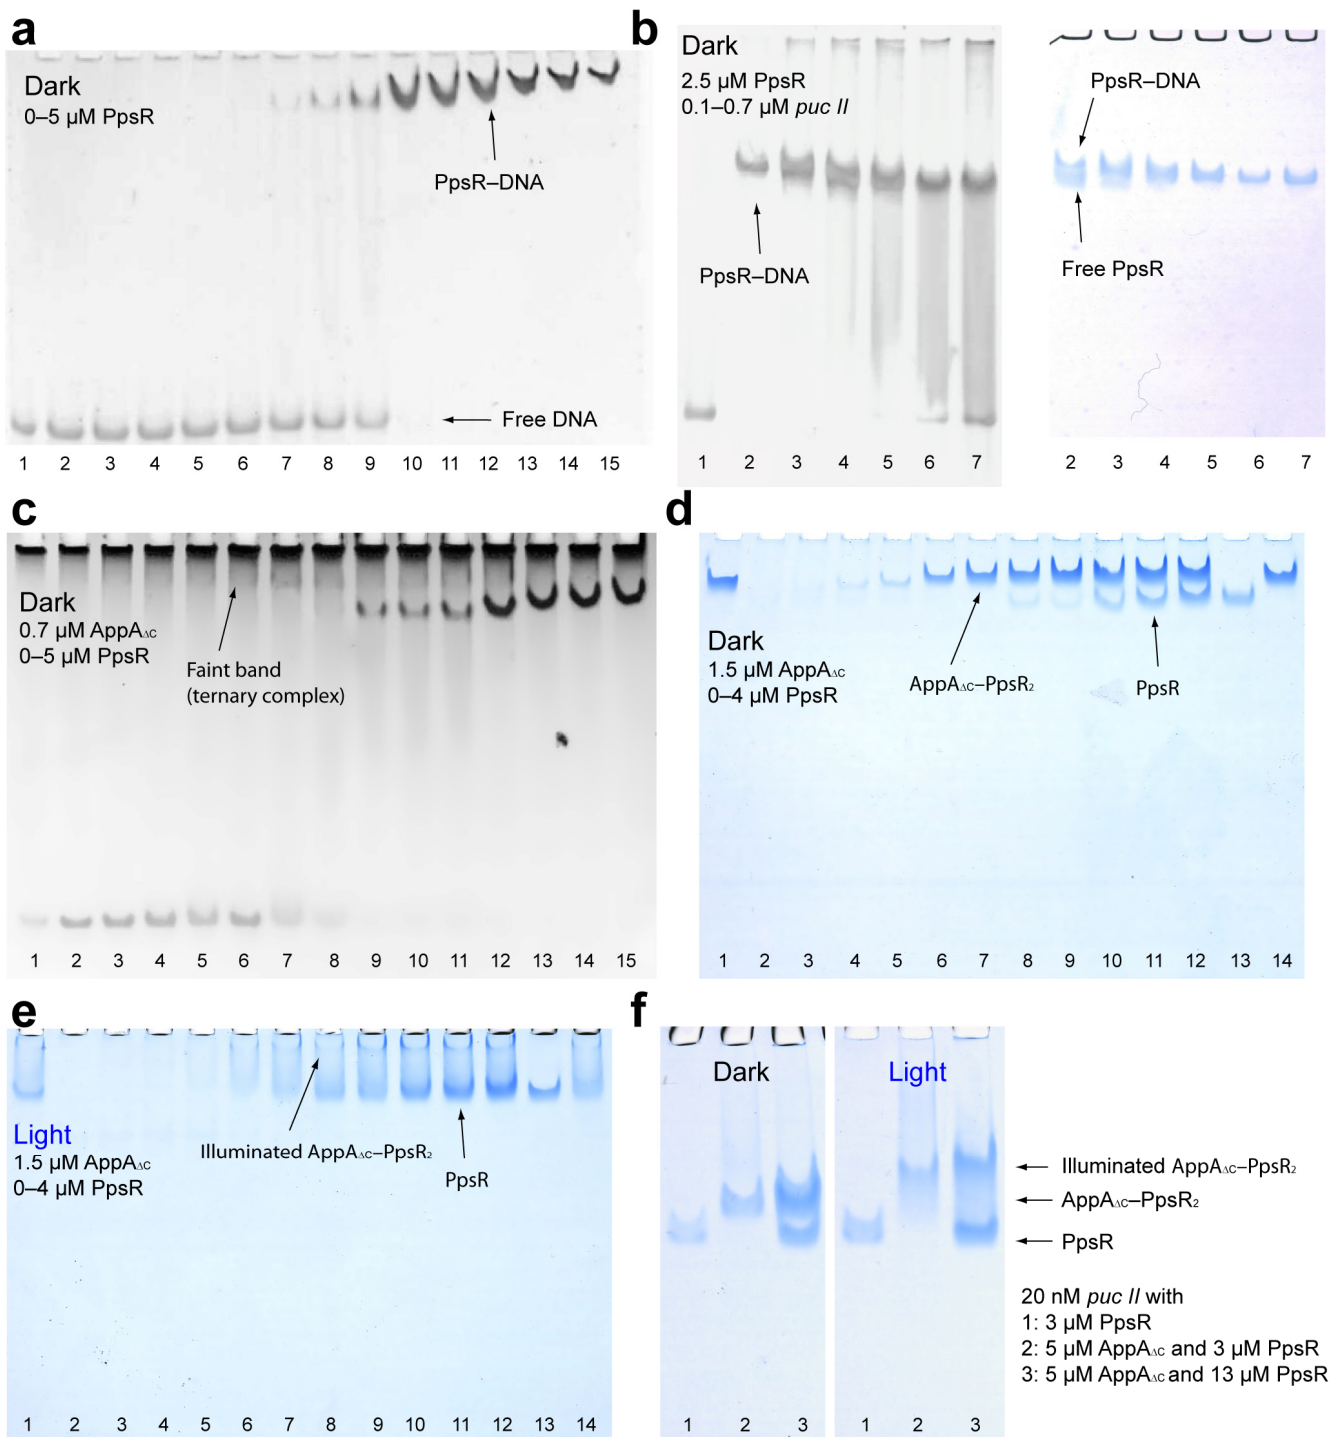

**Supplementary Figure 3.** Influence of AppA and blue-light on DNA-binding properties of PpsR. **(a)** EMSA showing the titration of 20 nM *puc I* with PpsR on a 10 % TGE gel. Lanes 1–15 – PpsR at 0, 0.03, 0.05, 0.09, 0.15, 0.25, 0.4, 0.6, 0.9, 1.3, 1.7, 2.3, 3.0, 3.8 and 5.0  $\mu\text{M}$ . These data were combined with a finer titration series around the transition point (data not shown). A semi-quantitative evaluation of PpsR affinity is presented in Figure 2b. **(b)** DNA (left) and Coomassie stain (right) of a 6 % TGE gel showing the active site titration performed at 2.5  $\mu\text{M}$  PpsR with increasing *puc II* concentrations. Lane 1 – 70 nM *puc II* alone (only shown for the DNA stain), lanes 2–7 – 0.1, 0.2, 0.3, 0.4, 0.5, 0.7  $\mu\text{M}$  *puc II* probe. For the first three titration points a band corresponding to free PpsR is observed in the Coomassie stain below the DNA bound species. At DNA concentrations above 0.3  $\mu\text{M}$  the free DNA probe appears

due to saturation of the 2.5  $\mu\text{M}$  PpsR present indicating a 1:8 stoichiometry of DNA:PpsR. Quantitative analysis of the active site titration is presented in the inset of Figure 2b. (c) EMSA showing PpsR-titration of 20 nM *puc I* DNA in the presence of 0.7  $\mu\text{M}$  AppA. In addition to DNA bound to PpsR a faint band with slower migration is observed. Lanes 1–15 – PpsR at 0, 0.5, 0.7, 0.9, 1.2, 1.4, 1.6, 1.8, 2.0, 2.2, 2.5, 2.9, 3.4, 4 and 5.0  $\mu\text{M}$ . (d) Coomassie stain of the EMSA showing the formation of a ternary AppA $\Delta\text{C}$ –PpsR–DNA complex upon PpsR titration of 20 nM *puc I* in the presence of 1.5  $\mu\text{M}$  AppA $\Delta\text{C}$  (Fig. 2c). Excision of the corresponding Coomassie stained bands and peptide mass fingerprinting using MALDI (data not shown) confirmed that the upper DNA-containing band corresponds to a mixture of AppA $\Delta\text{C}$  and PpsR while the lower band represents PpsR. Lane 1 – AppA $\Delta\text{C}$  + 2  $\mu\text{M}$  PpsR without DNA, Lane 2–12 – 0, 0.1, 0.25, 0.5, 1.0, 1.5, 2.0, 2.5, 3.0, 3.5, 4.0  $\mu\text{M}$  PpsR, lane 13 – 2  $\mu\text{M}$  PpsR without AppA and lane 14 – 2  $\mu\text{M}$  PpsR with AppA $\Delta\text{C}$  after 45 min dark recovery of an illuminated sample. (e) Coomassie stain of an EMSA showing the influence of blue-light on the ternary AppA $\Delta\text{C}$ –PpsR–DNA complex upon PpsR-titration of 20 nM *puc I* in the presence of 1.5  $\mu\text{M}$  AppA $\Delta\text{C}$  (cf. Fig. 2d). The faint upper band reflects the ternary complex and the lower band PpsR. The relative intensities of the two bands are shifted due to the light dependence of the complex affinity (cf. Supplementary Fig. 2b,c). Lane 1 – AppA + 2  $\mu\text{M}$  PpsR without DNA, Lanes 2–12 – 0, 0.1, 0.25, 0.5, 1.0, 1.5, 2.0, 2.5, 3.0, 3.5, 4.0  $\mu\text{M}$  PpsR, lane 13 – 2  $\mu\text{M}$  PpsR without AppA and lane 14 – sample equivalent to lane 8 after one light-dark cycle. (f) Coomassie stain of the EMSA from Figure 2e under dark and blue-light conditions using 20 nM of *puc II* probe and AppA $\Delta\text{C}$ –PpsR<sub>2</sub> saturating amounts of AppA $\Delta\text{C}$ . Lane 1 – 3  $\mu\text{M}$  PpsR, lane 2 – 5  $\mu\text{M}$  AppA $\Delta\text{C}$  + 3  $\mu\text{M}$  PpsR and lane 3 – 5  $\mu\text{M}$  AppA $\Delta\text{C}$  + 13  $\mu\text{M}$  PpsR (excess).

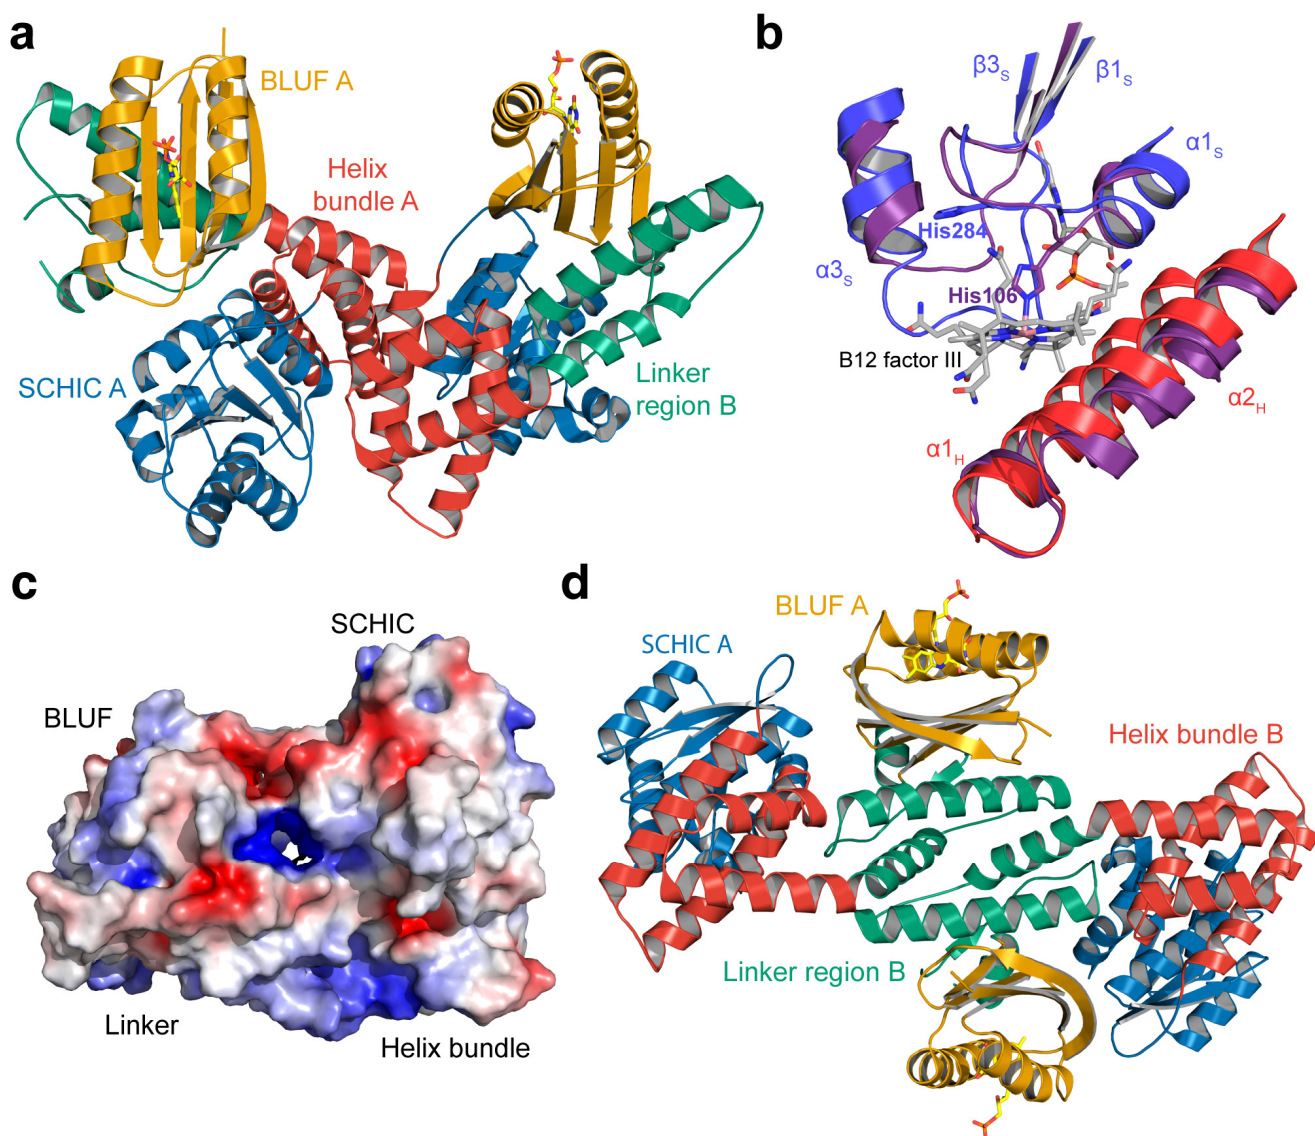

**Supplementary Figure 4.** Structural details of AppA $\Delta$ C. **(a)** Crystal contacts mediated by the 4HB and SCHIC between two protomers of the asymmetric unit in the AppA $\Delta$ C structure. Colors correspond to Figure 3a. FMN is shown as yellow stick model. **(b)** Close-up of the SCHIC domain focusing on the B<sub>12</sub> binding site of evolutionary related corrin binding proteins. His284 in AppA (colored in red and blue for 4HB and SCHIC, respectively) is structurally not related to His106 employed in the coordination of the 5-hydroxybenzimidazolylcobamide cofactor observed in the *Methanosarcina barkeri* monomethylamine corrinoid protein (purple, pdb 3EZX). Based on the conservation of secondary structure elements and the loop between ( $\beta 1$  and  $\alpha 1$ )<sub>S<sub>A</sub></sub>, His284 is shifted by two residues compared to B<sub>12</sub> binding proteins. **(c)** Surface representation of AppA $\Delta$ C. Solvent channels to a cavity between the BLUF and SCHIC domains highlight the weak intramolecular interaction of AppA $\Delta$ C domains. The structure is colored with respect to the electrostatic surface potential showing a random distribution of patches with positive (blue) and negative (red) potentials. **(d)** Crystal contacts mediated by the linker region (bluish-green) of BLUF and 4HB. The protomers of the AppA dimer shown here are related via two-fold crystallographic symmetry. Coloring of individual domains follows Figure 3a and FMN is shown as yellow stick model.

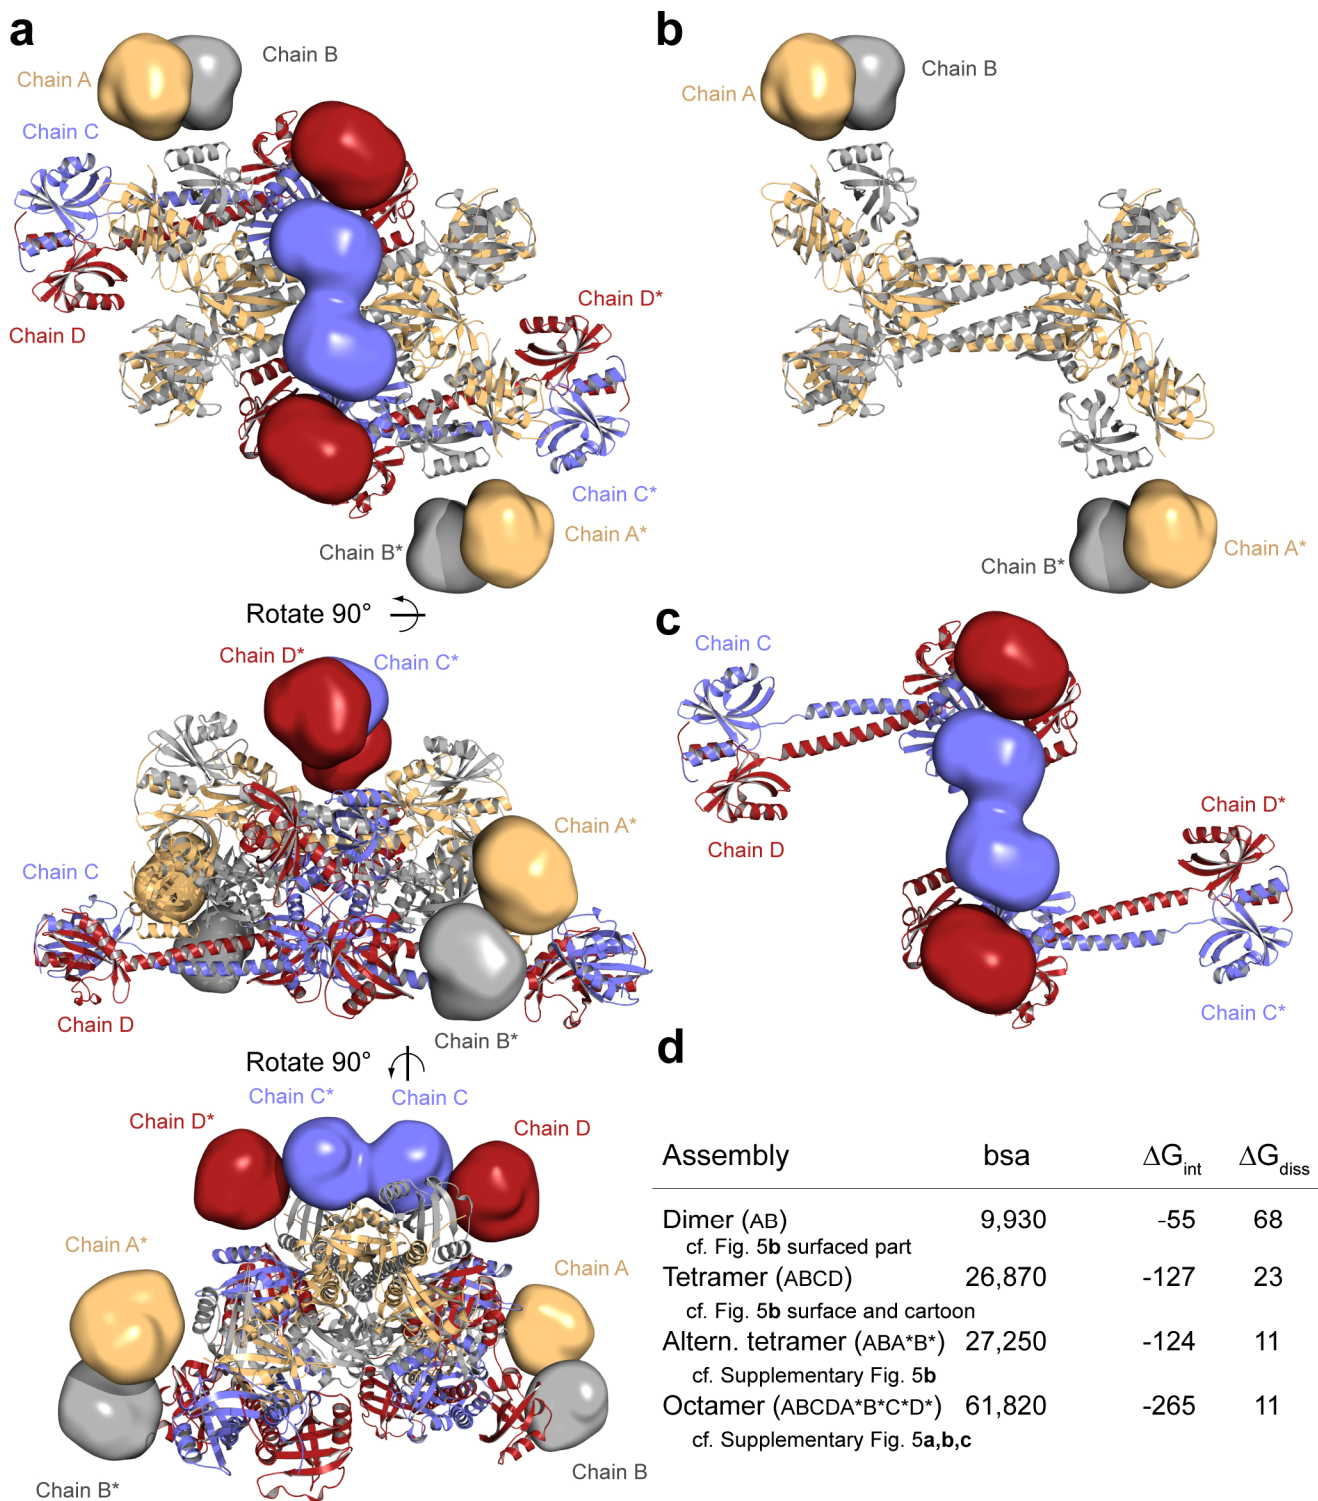

**Supplementary Figure 5.** Details of oligomer states of PpsR. (a) Three 90° rotations of the PpsR  $\Delta$ HTH octamer are shown in cartoon representation color-coded according to Figure 4c. Chains A, B, C and D of the crystallographic symmetry-related tetramer are colored accordingly and marked with an asterisk. The HTH motifs are shown as surface representations extending from the PAS2 C-termini as described in Figure 4c. The different orientations highlight the unfavorable distance of two HTH dimers within a single tetrameric unit for DNA-binding without considering major structural rearrangements. Appropriate positioning of four PpsR HTH motifs capable of binding to two palindromes separated by



half a DNA turn in the *puc* promoter depends on the presence of all eight protomers as highlighted in panels **b** and **c**. **(b)** Representation of an alternative PpsR tetramer, mediated solely by the  $\alpha$ Q and PAS1 interface equivalent to the octamer interaction. The HTH motifs of this assembly are unlikely to allow efficient DNA-binding, but large structural changes of PAS2 and the HTH motif could occur in this assembly. However, the N-Q-PAS1 construct does not form tetramers at comparable concentrations to full-length PpsR (data not shown) and, in addition, the destabilization of the  $\alpha$ 3<sub>2\_P</sub>,  $\beta$ 4<sub>2\_P</sub> and  $\beta$ 5<sub>2\_P</sub> elements observed by HDX upon AppA $\Delta$ C-PpsR<sub>2</sub> complex formation, supporting a role of the PAS2 domain in tetramerization, favors the Figure 4**b** tetramer as the dominant in-solution assembly of PpsR. **(c)** The four HTH motifs implicated in DNA-binding according to our model (dark-red and light-blue) require the additional four PpsR subunits for proper positioning in the octameric assembly. **(d)** Overview of PISA<sup>4</sup> generated statistics for the individual PpsR oligomers discussed in this study based on the PpsR $\Delta$ HTH structure. High  $\Delta G_{\text{diss}}$  values indicate that a substantial external driving force is necessary to dissociate the corresponding assembly. This clearly highlights PpsR dimers as a stable oligomeric species that can be formed from the less stable tetrameric assembly. The calculated  $\Delta G_{\text{diss}}$  values further favor the crystallographic tetramer (Fig. 4**b**) compared to the alternative tetramer (panel **b**) as the major in-solution species. In full-length PpsR the stability of the octameric assembly would be increased by the additional interaction of the HTH-motifs, especially in the presence of DNA according to the model proposed in Figure 4**c**. bsa – buried surface area ( $\text{\AA}^2$ );  $\Delta G_{\text{int}}$  – solvation free energy gain upon formation of the assembly ( $\text{kcal M}^{-1}$ ),  $\Delta G_{\text{diss}}$  – free energy of assembly dissociation ( $\text{kcal M}^{-1}$ ).

**a**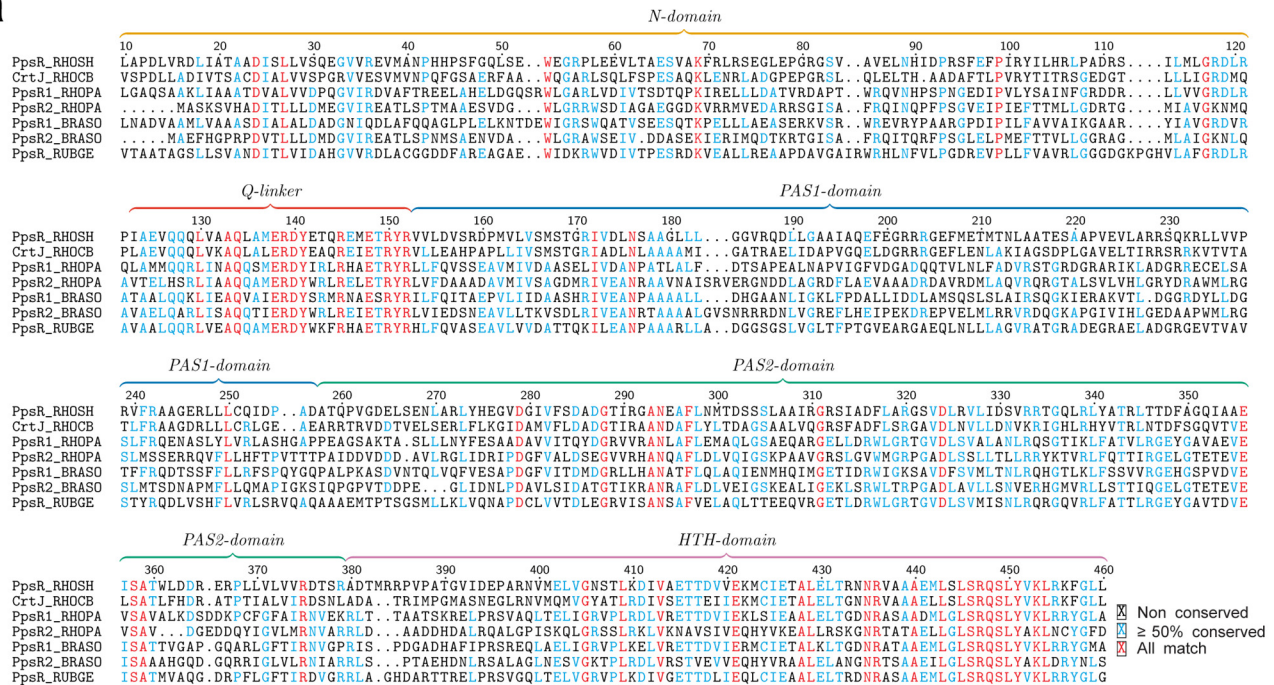**b**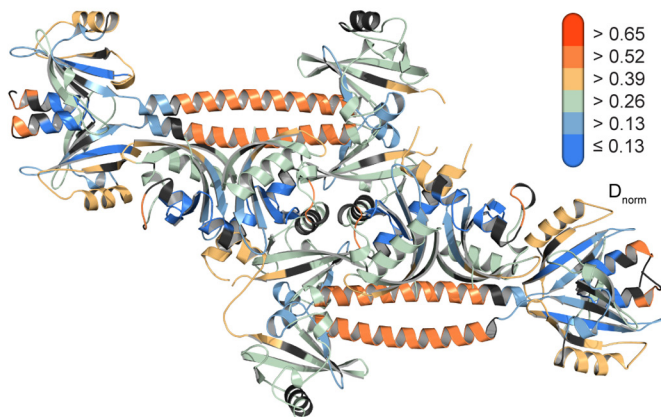**c**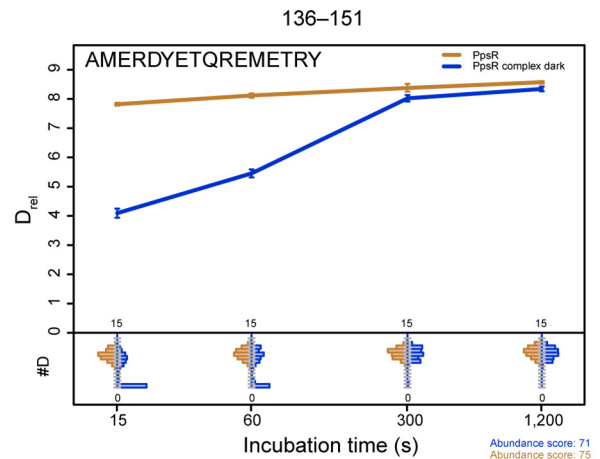**d**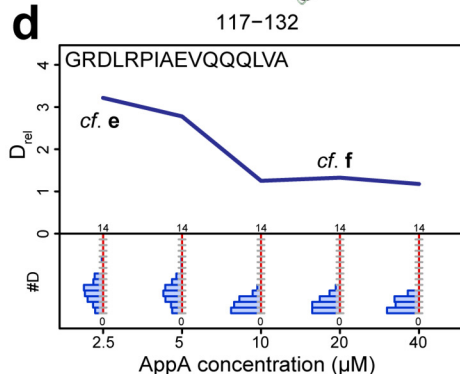**e**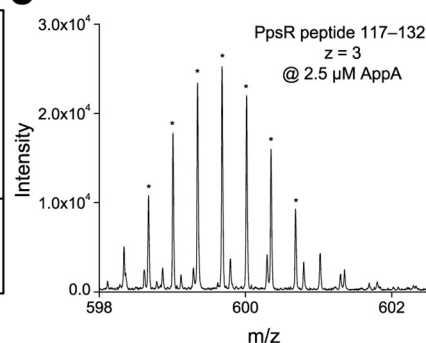**f**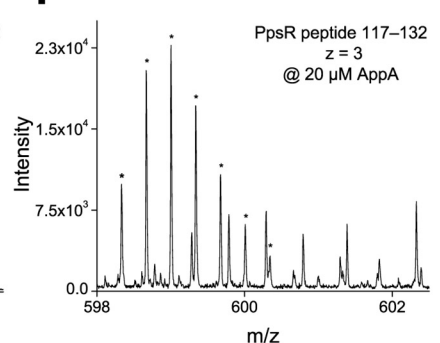

**Supplementary Figure 6.** Alignment of PpsR homologues and details of HDX experiments for PpsR. (a) Multiple sequence alignment of PpsR from different organisms. RHOSH – *R. sphaeroides*, Uniprot accession number (UAN) Q9S301, RHOCB – *R. capsulatus*, UAN D5ANS9, RHOPA – *Rhodopseudomonas palustris* UAN Q6N9L3 and Q6N9K7, BRASO – *Bradyrhizobium sp.* UAN Q6A567 and Q8VUB5, RUBGE – *Rubrivivax gelatinosus* UAN Q9JP99. The alignment was performed

using Jalview and the MUSCLE algorithm<sup>5,6</sup>. **(b)** PpsR structure colored with respect to deuterium incorporation in the dark after 15 sec labeling. Blue colors reflect stable secondary structure elements and the exchange kinetics of regions increase via green to orange and red. The relatively high deuterium incorporation in the Q-linker region reflects the dimer–tetramer equilibrium of PpsR in solution with the Q-linker serving as the docking site for PAS2 domains from the respective other dimer. Details for the normalization procedure ( $D_{\text{norm}}$ ) are described in the Supplementary Note. **(c)** Deuterium uptake plots of a Q-linker peptide in PpsR alone (brown) compared to the AppA $_{\Delta C}$  complexed form (blue). The main sub-panel shows  $D_{\text{rel}}$  plotted against labeling time for the peptide specified at the top. The estimated abundance distribution of individual deuterated species is presented in the lower sub-panel on a scale from undeuterated (0) to all exchangeable amides deuterated (number of amino acids – prolines – 1). The pronounced protection of  $\alpha Q$  upon complex formation with AppA $_{\Delta C}$  features a bimodal distribution of deuterated species as shown in the lower part of the panel. This can be attributed to slower association or dissociation kinetics of the AppA $_{\Delta C}$ –PpsR $_2$  complex compared to the chemical exchange rate of free PpsR in this region. This is further supported by an additional non-overlapping  $\alpha Q$  peptide as shown in panel **d**. High and stable abundance scores (normalized intensity distribution from 0 to 100 %) for both measurements attest that this observation is not due to carry-over from previous injections. **(d)** AppA $_{\Delta C}$  titration curve for a Q-linker peptide determined by HDX-MS. The main sub-panel shows  $D_{\text{rel}}$  plotted against AppA $_{\Delta C}$  concentration for the peptide specified at the top. A software estimated abundance distribution of individual deuterated species is presented in the lower sub-panel on a scale from undeuterated (0) to all exchangeable amides deuterated. 10  $\mu\text{M}$  AppA $_{\Delta C}$  corresponds to the concentration used in the full datasets evaluated and described in this work. Additional experiments were performed at constant PpsR concentrations and the indicated AppA $_{\Delta C}$  concentrations during labeling. Deuterium incorporation after 15 s labeling is shown for all concentrations. EX1-like exchange characteristics are supported by the increased distribution width during the transition from free PpsR to AppA $_{\Delta C}$ –PpsR $_2$ . **(e,f)** Raw data corresponding to 15 s labeling time and the 2.5 and 20  $\mu\text{M}$  AppA $_{\Delta C}$  titration points of the peptide shown in panel **d**. The seven most intense isotope peaks of the series of interest are marked with an asterisk.



**Supplementary Figure 7.** Summary of HDX experiments. **(a)** The model of the AppA<sub>ΔC</sub>-PpsR<sub>2</sub> complex as described in Figure 6c colored with respect to the observed changes in deuterium incorporation between light- and dark-state measurements of the complex. The 15 s time point is shown for visualization of protection (blue) or destabilization (red) upon complex illumination. See also Supplementary Movie 7 for the full time dependence. The color of the HTH-blob models corresponds to an averaged value for all peptides originating from this region. A complete illustration of all AppA and PpsR peptides evaluated by HDX in the various analyzed states is presented in panels **b-f**. Zoom in on the electronic version to reveal full details, with each box reflecting one peptide and containing up to four different colors that, from the bottom up, represent the incubation times of 15, 60, 300 and 1,200 s, respectively. Individual colors correspond to the change in relative deuteration ( $\Delta D_{rel}$ ) of the two compared states according to the legend in the top left corner. MS<sup>2</sup> confirmed peptides are marked with diamonds. Terminal arrows at the end of a box indicate continuation of the peptide in the previous or following line. Secondary structure elements are taken from DSSP analysis<sup>7</sup> of the corresponding structures. Numbering corresponds to the wild-type proteins (Uniprot Q53119 for AppA and Q9S301 for PpsR). In addition, a compilation of all deuteration plots for AppA<sub>ΔC</sub> and PpsR can be found in Supplementary Figure 8. **(b)** Changes in AppA<sub>ΔC</sub> deuteration upon blue-light illumination (also see Supplementary Movie 1). **(c)** Changes in AppA<sub>ΔC</sub> deuteration upon complex formation with PpsR (also see Supplementary Movies 2 and 6). **(d)** Changes in deuteration of PpsR upon complex formation with AppA<sub>ΔC</sub> (also see Supplementary Movies 3 and 6). **(e)** Changes in AppA<sub>ΔC</sub> deuteration upon blue-light illumination of the complex species (also see Supplementary Movies 4 and 7). **(f)** Changes in deuteration of PpsR upon blue-light illumination of AppA<sub>ΔC</sub>-PpsR<sub>2</sub> (also see Supplementary Movies 5 and 7).

**a**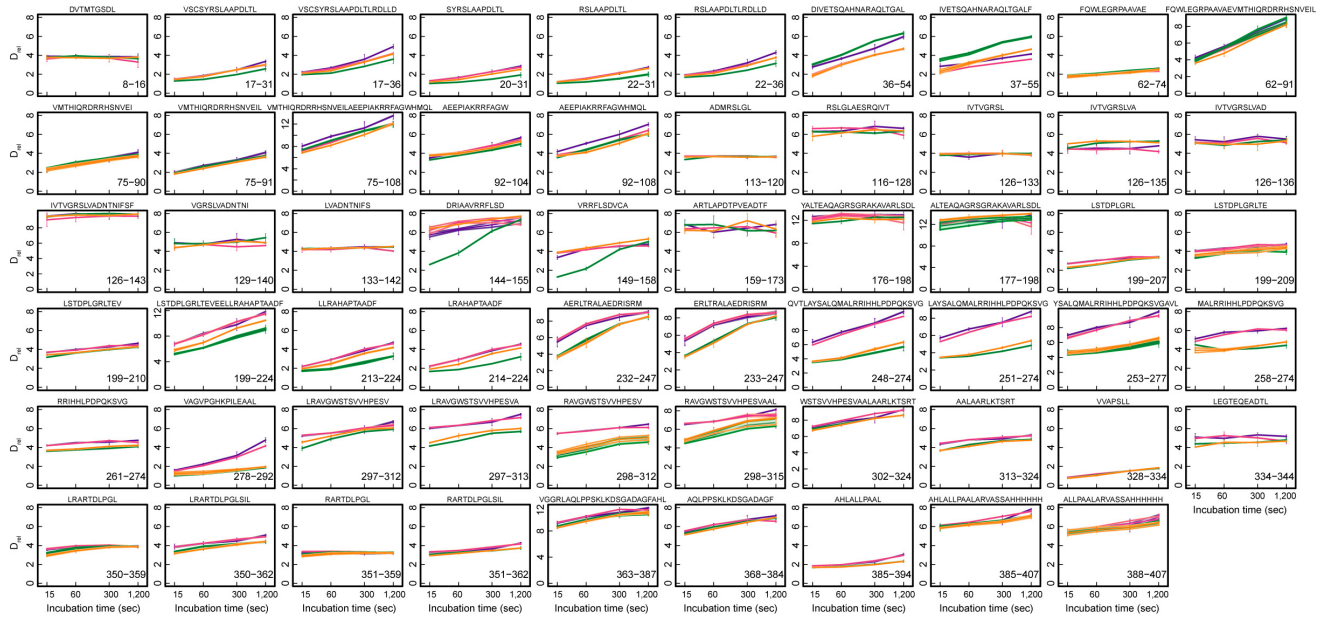**b**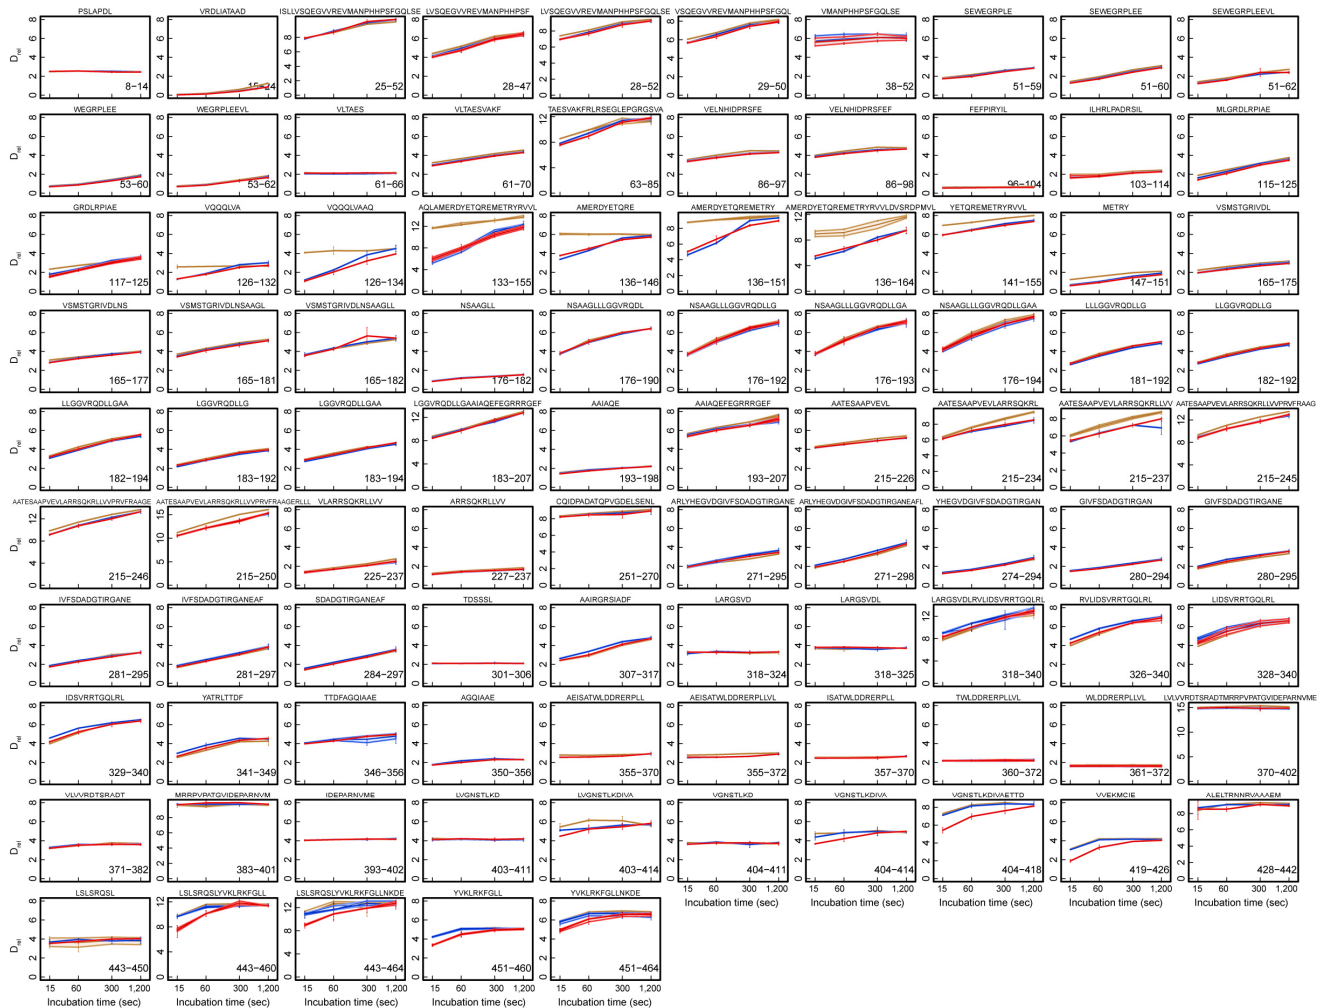

**Supplementary Figure 8.** Individual deuterium incorporation plots of all evaluated peptides. (a) AppA<sub>ΔC</sub> traces are colored in purple, pink, green and orange corresponding to free AppA<sub>ΔC</sub> in the dark- and light-state, as well as AppA<sub>ΔC</sub>–PpsR<sub>2</sub> in the dark- and light-state, respectively. (b) PpsR traces colored in brown, blue and red correspond to free PpsR, as well as AppA<sub>ΔC</sub>–PpsR<sub>2</sub> in the dark- and light-state, respectively. Peptide sequences and their corresponding numbers are shown on top and in the bottom right corner, respectively, of each sub-panel. Ordinates of each plot correspond to the relative deuterium incorporation and abscissae to the labeling time in seconds, shown at the bottom of each panel. Zoom in on the figure in the electronic version for full details.

**Supplementary Table 1.** List of primers for generation of different AppA and PpsR constructs and for amplification of DNA probes for EMSAs.

| Primer | Description             | Sequence 5' to 3'                                               |
|--------|-------------------------|-----------------------------------------------------------------|
| 1      | AppA forward (fw.)      | GCTACCATGGCGCACGACCTCGAGGCGGACG                                 |
| 2      | AppA full reverse (rv.) | TATGCGGCCGCTCAGTGATGGTGATGGTGATGGGCGCTG<br>GCGCTGCGGCGGCGGTC    |
| 3      | AppA Δ399 rv.           | TATGCGGCCGCTCAGTGATGGTGATGGTGATGGGCGCTGC<br>TGGCCACACGGGCGAGGGC |
| 4      | AppA 4HB-SCHIC fw.      | TACGCCATGGTCGAGGCGGACACCTTCGC                                   |
| 5      | C20S mutagenesis fw.    | GATCTGGTTTCCTGCTCCTACCGCAGCCTGGCG                               |
| 6      | C20S mutagenesis rv.    | CGCCAGGCTGCGGTAGGAGCAGGAAACCAGATC                               |
| 7      | Q63E mutagenesis fw.    | GCCAGGGCGTCTTCTTCGAATGGCTCGAAGGCCGCC                            |
| 8      | Q63E mutagenesis rv.    | GGCGGCCTTCGAGCCATTCGAAGAAGACGCCCTGGC                            |
| 9      | PpsR fw.                | ATATCCATGGGAATGGGTCTGGCAGGCGGTTT                                |
| 10     | PpsR full rv.           | ATATGCGGCCGCTCGAGTTATTCATCTTTATTCAGCAGG                         |
| 11     | PpsR ΔHTH rv.           | ATATGCGGCCGCTTAACGGCTGGTATCACGAACAACC                           |
| 12     | PpsR N–Q–PAS1 rv.       | ATATGCGGCCGCTTAATCTGCCGGATCAATCTGACACAGC                        |
| 13     | <i>puc I</i> fw.        | Cy5-ATCCAAAACGGCCTTGTC                                          |
| 14     | <i>puc I</i> rv.        | ATCGCATTATGGGTGTCAC                                             |
| 15     | <i>puc II</i> fw.       | Cy5-GGACAGGCAGCGTCAATTTC                                        |
| 16     | <i>puc II</i> rv.       | TTGCGTGTAGGGCCTGCACG                                            |

**Supplementary Movie 1.** Animation of differential plots showing evaluated peptides from two HDX experiments (AppA<sub>ΔC,light</sub> – AppA<sub>ΔC,dark</sub>) plotted onto the structure of AppA<sub>ΔC</sub>. Colors correspond to the bar legend in the animation with red indicating increased deuterium uptake in the light-state measurement of isolated AppA<sub>ΔC</sub>. The time course represents the deuterium labeling times of 15, 60, 300 and 1,200 seconds. See Supplementary Figure 7b for details of peptides used in this animation with additional overlapping peptides supporting the colors in this movie.

**Supplementary Movie 2.** Animation of differential plots showing evaluated peptides from two HDX experiments [(AppA<sub>ΔC</sub>–PpsR<sub>2,dark</sub>) – AppA<sub>ΔC,dark</sub>] plotted onto the structure of AppA<sub>ΔC</sub>. Colors correspond to the bar legend in the animation with blue indicating reduced deuterium uptake upon complex formation. The time course corresponds to the deuterium labeling times of 15, 60, 300 and 1,200 seconds. See Supplementary Figure 7c for details of peptides used in this animation with additional overlapping peptides supporting the colors in this movie.

**Supplementary Movie 3.** Animation of differential plots showing evaluated peptides from two HDX experiments  $[(\text{AppA}_{\Delta\text{C}}\text{-PpsR}_{2,\text{dark}}) - \text{PpsR}_{\text{dark}}]$  plotted onto the  $\text{PpsR}_{\Delta\text{HTH}}$  structure. Colors correspond to the bar legend in the animation with blue indicating reduced deuterium uptake upon complex formation. The time course corresponds to the deuterium labeling times of 15, 60, 300 and 1,200 seconds. See Supplementary Figure 7d for details of peptides used in this animation with additional overlapping peptides supporting the colors in this movie.

**Supplementary Movie 4.** Animation of differential plots of evaluated peptides from two HDX experiments  $[(\text{AppA}_{\Delta\text{C}}\text{-PpsR}_{2,\text{light}}) - (\text{AppA}_{\Delta\text{C}}\text{-PpsR}_{2,\text{dark}})]$  plotted onto the structure of  $\text{AppA}_{\Delta\text{C}}$ . Colors correspond to the bar legend in the animation with red indicating increased deuterium uptake in the light-state measurement of the complex. The time course represents the deuterium labeling times of 15, 60, 300 and 1,200 seconds. See Supplementary Figure 7e for details of peptides used in this animation with additional overlapping peptides supporting the colors in this movie.

**Supplementary Movie 5.** Animation of differential plots showing evaluated peptides from two HDX experiments  $[(\text{AppA}_{\Delta\text{C}}\text{-PpsR}_{2,\text{light}}) - (\text{AppA}_{\Delta\text{C}}\text{-PpsR}_{2,\text{dark}})]$  plotted onto the  $\text{PpsR}_{\Delta\text{HTH}}$  structure. Colors correspond to the bar legend in the animation with red indicating increased deuterium uptake in the light-state measurement of the complex. The subtle destabilization observed for some  $\alpha\text{Q}$  peptides originates from peptides exhibiting EX1-like deuteration characteristics and can therefore be attributed to the slightly lower affinity of the complex species during labeling under light conditions, as suggested by the native PAGE data. The time course represents the deuterium labeling times of 15, 60, 300 and 1,200 seconds. See Supplementary Figure 7f for details of peptides used in this animation with additional overlapping peptides supporting the colors in this movie.

**Supplementary Movie 6.** Animation of differential plots showing evaluated peptides from three HDX experiments  $[(\text{AppA}_{\Delta\text{C}}\text{-PpsR}_{2,\text{dark}}) - \text{PpsR}_{\text{dark}}]$  and  $[(\text{AppA}_{\Delta\text{C}}\text{-PpsR}_{2,\text{dark}}) - \text{AppA}_{\Delta\text{C},\text{dark}}]$  plotted onto the structures of the PpsR and AppA subunits of the core complex, respectively. Colors correspond to the bar legend in the animation with blue indicating reduced deuterium uptake upon complex formation. The time course corresponds to the deuterium labeling times of 15, 60, 300 and 1,200 seconds.

**Supplementary Movie 7.** Animation of differential plots showing evaluated peptides from two HDX experiments  $[(\text{AppA}_{\Delta\text{C}}\text{-PpsR}_{2,\text{light}}) - (\text{AppA}_{\Delta\text{C}}\text{-PpsR}_{2,\text{dark}})]$  plotted onto a full length model of the  $\text{AppA}_{\Delta\text{C}}\text{-PpsR}_2$  complex structure generated as described for Figure 6c. The blobs representing the HTH dimer are colored with an average color for the peptides originating from this region. Colors correspond to the bar legend in the animation with blue indicating reduced deuterium uptake upon complex illumination. The time course corresponds to the deuterium labeling times of 15, 60, 300 and 1,200 seconds.



## Supplementary Note

### **Microscale thermophoresis**

We quantified the interaction of AppA and PpsR using microscale thermophoresis (Nanotemper). For this purpose, we labeled either PpsR or AppA constructs at the amine positions using the NHS-reactive dye NT-647 (Nanotemper) according to the instructions of the manufacturer. Titrations with the labeled species kept constant and varying the corresponding other protein concentration in 1:2 dilutions over an appropriate concentration range were carried out in buffer B. We used standard treated capillaries (Nanotemper) for all experiments. Data of three individual experiments were evaluated using the quadratic equation of the law of mass action for fitting with a fixed concentration of the labeled species. Protein concentrations were quantified by their absorption at 280 nm (see below).

### **AppA control experiments addressing the truncation and mutation**

Low expression levels of soluble AppA and a tendency of the protein to aggregate have hampered its analysis in the past<sup>1,8,9</sup>. Deletion of the cysteine-rich region resulted in five-fold higher yields of soluble protein with the shortened construct, termed AppA  $\Delta$ 399. The yield can be further improved ten-fold by mutating Cys20 to serine. Together, these modifications enabled purification of AppA in the quantities and quality needed for a detailed biochemical and biophysical characterization.

Control experiments shown in Supplementary Figure 1a,b,c,d confirm that neither the BLUF photocycle nor AppA-PpsR<sub>2</sub> complex formation is affected by the C20S mutation and the C-terminal truncation of AppA. In addition, the functionality of AppA lacking the cysteine-rich region has been shown *in vivo*<sup>10</sup>. For this reason, if not indicated otherwise, all experiments were performed with the AppA  $\Delta$ 399 C20S construct which is referred to as AppA $\Delta$ C.

### **Structural aspects of the AppA SCHIC domain**

The 4HB and SCHIC arrangement resembles combinations of helix bundles with the evolutionary related corrinoid binding domains (SCOP 52242), respectively (e.g. pdb 3EZX). The second pair of helices from the 4HB interacts with the SCHIC domain and forms a hydrophobic interface where the B12 cofactor would be located in the case of corrinoid binding proteins. In our structure no cofactor is bound since we performed expression and purification under aerobic conditions, where the proposed heme ligand for this domain does not co-purify<sup>9,10</sup>. Notably, His284 positioned in the loop between  $\beta$ 1 and  $\alpha$ 1 of the SCHIC domain, was previously suggested as axial ligand for cofactor binding<sup>10,11</sup>. However, it is structurally unrelated to the histidine involved in B12 binding (Supplementary Fig. 4b).

## HDX-MS

HDX was used to address complex formation and light-induced structural rearrangements in AppA and PpsR. Incubation in D<sub>2</sub>O containing buffer was carried out for various times under dark or blue-light conditions and allowed measuring the time dependent deuterium uptake in amide positions at an average resolution of several amino acids. The observed exchange characteristics provide information on the stability and dynamics of the secondary structure elements since these affect deuterium uptake. Quantification of the absolute deuterium uptake requires measurement of the back-exchange rates for individual peptides (~35 % at our experimental conditions); however, comparative experiments performed under identical experimental conditions for two different conformations of a protein enable the interpretation in terms of structural changes between the two states without quantitative back-exchange determination<sup>11</sup>.

In contrast to comparative experiments, the colors used in Figure 3d and Supplementary Figure 6b indicate the average deuterium incorporation from a single HDX experiment. While blue regions describe elements incorporating less than average deuterium per amide position and hence reflect stable secondary structure elements, the degree of exchange increases from green to orange to red. Interestingly, the higher average deuterium incorporation in the linker region of AppA<sub>ΔC</sub> is mainly caused by peptides reaching their highest deuteration level already upon short deuterium exposure. This indicates a significant fraction of unstructured or flexible elements. Therefore, the conformation of the linker region as observed in the crystal structure needs careful interpretation, particularly as the linker forms crystal contacts with a symmetry related molecule (Supplementary Fig. 4d).

We initially analyzed deuterium incorporation manually in a semi-automated process using HX-Express<sup>12</sup> and used the obtained results for quality control of data generated by an improved version of the automated software package Hexicon<sup>13</sup>. This in-house developed program (to be published) is based on the previously published NITPICK algorithm for feature detection<sup>14</sup> and Hexicon for the analysis of deuterium incorporation. Deuterium incorporation was quantified by the mean shift of a peptide's mass centroid in triplicate measurements. The absolute mass shift difference in a peptide's "relative deuterium incorporation"<sup>12</sup> ( $\Delta D_{rel}$ ) between two states (i.e., light- vs. dark-adapted or free vs. complex-bound) was used to gauge the changes in structural changes of the corresponding region in the protein. Deuterium incorporation for individual measurements was evaluated based on the average mass increase per exchangeable amide proton ( $D_{norm}$ ). Since also not corrected for back-exchange this measure gives an indication of regions with above average deuterium uptake and hence increased exchange kinetics compared to stable secondary structure elements characterized by less exchange.

Importantly, HDX data originate from an ensemble measurement which can not distinguish between asymmetric elements as would be observed in an AppA–PpsR<sub>2</sub> complex. Since the AppA-binding site is oriented to one face of the N–Q–PAS1 dimer region, elements involved in this interaction are colored on both sides of the structure. Elements colored in dark-grey represent regions not covered by peptic fragments and in addition also include two N-terminal amino acids of all identified peptides since rapid back-exchange in these positions prevents accurate measurement of deuteration.

### **Details of structure refinement**

The AppA<sub>ΔC</sub> structure was solved by experimental SAD phasing using the AutoSol feature of PHENIX combining a high resolution (2.6 Å) native dataset with anomalous data from a different crystal to 3.9 Å. Initial fragments of secondary structure elements were automatically built and extended manually in subsequent steps of refinement. Secondary structure restraints and 3 TLS groups per protomer were included for refining individual positions and B-factors. The low resolution wild-type structure was solved upon rigid-body fitting of the high resolution structure and refined using a set of dihedral restraints obtained from the high resolution model. This confirmed that the observed conformations of Trp104 and Met106 are not due to the C20S substitution. Both final models contained no outliers in the Ramachandran plot with 97 % of the residues in the favored region.

Elucidation of the PpsR ΔHTH structure was not straightforward and a detailed description will be presented elsewhere. In brief, a combination of experimental phasing (anomalous data to 5.5 Å) with molecular replacement (MR) based on shorter PpsR constructs provided a reasonable initial map for model building. Refinement initially included experimental phase information using a phased maximum-likelihood target (MLHL). In addition torsion-NCS restraints for chains A and D as well as B and C and secondary structure restraints were included together with TLS groups for the individual domains of the protein (N domain, Q-linker, PAS1 and PAS2). NCS and experimental phase restraints were omitted in the final round of refinement. Ramachandran statistics show 96.1 % of the residues in favored regions and 0.1 % outliers.

The core complex of AppA and PpsR was solved by MR based on the individual PAS domain dimers of PpsR (N and PAS1) and the four helix bundle together with the SCHIC domain of AppA. Due to the high resolution, rebuilding of elements involved in complex formation was straightforward and refinement included TLS groups for the individual domains (N domain, Q-linker, PAS1, helix bundle and SCHIC) without any additional restraints. The final model has good Ramachandran statistics with no outliers and 98.1 % the residues in the favored region.

$R_{\text{free}}$  values<sup>15</sup> were computed from 5 % randomly chosen reflections not used during the refinement. 2D-plots of secondary structure elements of AppA<sub>ΔC</sub> and PpsR<sub>ΔHTH</sub> (Fig. 3a and 4a) were prepared by modification of automatically generated outputs obtained from the Pro-Origami server<sup>16</sup>.

### UV/Vis spectroscopy

In order to minimize spectral artifacts originating from the measuring light we used a home-built setup for addressing dark- and light-state spectra of AppA. This consists of a balanced deuterium tungsten lamp (DH-2000-BAL, Mikropack) used as measuring light source after reducing the intensity with a neutral density OD10 filter and a royal blue LED ( $\lambda_{\text{max}} = 455$  nm, Doric Lenses) with variable intensity as excitation light source. Data was acquired in continuous “kinetic” mode employing a spectrograph coupled to an electron multiplying CCD detector (Andor Technology). We acquired single spectra for one second of which only selected spectra for the dark state recovery are shown. Buffer conditions for the photocycle experiments were 10 mM CHES pH 8.5, 500 mM NaCl and 5 % (w/v) glycerol.

### Protein concentration determination

We estimated protein concentrations based on the calculated extinction coefficients for AppA and PpsR at 280 nm. PpsR (reduced) – 19,940 M<sup>-1</sup> cm<sup>-1</sup>, PpsR  $\Delta$ HTH – 18,450 M<sup>-1</sup> cm<sup>-1</sup>, PpsR N–Q–PAS1 – 9,970 M<sup>-1</sup> cm<sup>-1</sup>. In the case of AppA constructs encompassing the BLUF domain, a value of  $\epsilon_{280}=19,000$  M<sup>-1</sup> cm<sup>-1</sup> was added to account for the flavin absorption and full loading with FMN was confirmed by comparison with the flavin absorbance at 445 nm based on an extinction coefficient of 12,300 M<sup>-1</sup> cm<sup>-1</sup>. AppA full-length (reduced) – 41,460 M<sup>-1</sup> cm<sup>-1</sup>, AppA  $\Delta$ 399 – 41,460 M<sup>-1</sup> cm<sup>-1</sup>, 4HB–SCHIC domain – 8,480 M<sup>-1</sup> cm<sup>-1</sup>.

## Supplemental References

1. Masuda, S. & Bauer, C.E. AppA is a blue light photoreceptor that antirepresses photosynthesis gene expression in *Rhodobacter sphaeroides*. *Cell* **110**, 613-623 (2002).
2. Dragnea, V., Arunkumar, A.I., Lee, C.W., Giedroc, D.P. & Bauer, C.E. A Q63E *Rhodobacter sphaeroides* AppA BLUF Domain Mutant Is Locked in a Pseudo-Light-Excited Signaling State. *Biochemistry* **49**, 10682-10690 (2010).
3. Lukacs, A. et al. Photoexcitation of the Blue Light Using FAD Photoreceptor AppA Results in Ultrafast Changes to the Protein Matrix. *Journal of the American Chemical Society* **133**, 16893-16900 (2011).
4. Krissinel, E. & Henrick, K. Inference of macromolecular assemblies from crystalline state. *J Mol Biol* **372**, 774-97 (2007).
5. Waterhouse, A.M., Procter, J.B., Martin, D.M., Clamp, M. & Barton, G.J. Jalview Version 2--a multiple sequence alignment editor and analysis workbench. *Bioinformatics* **25**, 1189-91 (2009).
6. Edgar, R.C. MUSCLE: multiple sequence alignment with high accuracy and high throughput. *Nucleic Acids Research* **32**, 1792-7 (2004).
7. Kabsch, W. & Sander, C. Dictionary of protein secondary structure: pattern recognition of hydrogen-bonded and geometrical features. *Biopolymers* **22**, 2577-637 (1983).
8. Gomelsky, M. & Kaplan, S. AppA, a redox regulator of photosystem formation in *Rhodobacter sphaeroides* 2.4.1, is a flavoprotein - Identification of a novel FAD binding domain. *Journal of Biological Chemistry* **273**, 35319-35325 (1998).
9. Han, Y.C., Meyer, M.H.F., Keusgen, M. & Klug, G. A haem cofactor is required for redox and light signalling by the AppA protein of *Rhodobacter sphaeroides*. *Molecular Microbiology* **64**, 1090-1104 (2007).
10. Moskvina, O.V., Kaplan, S., Gilles-Gonzalez, M.A. & Gomelsky, M. Novel heme-based oxygen sensor with a revealing evolutionary history. *Journal of Biological Chemistry* **282**, 28740-28748 (2007).
11. Iacob, R.E. & Engen, J.R. Hydrogen exchange mass spectrometry: are we out of the quicksand? *J Am Soc Mass Spectrom* **23**, 1003-10 (2012).
12. Weis, D.D., Engen, J.R. & Kass, I.J. Semi-automated data processing of hydrogen exchange mass spectra using HX-Express. *J Am Soc Mass Spectrom* **17**, 1700-3 (2006).
13. Lou, X. et al. Deuteration distribution estimation with improved sequence coverage for HX/MS experiments. *Bioinformatics* **26**, 1535-41 (2010).
14. Renard, B.Y., Kirchner, M., Steen, H., Steen, J.A. & Hamprecht, F.A. NITPICK: peak identification for mass spectrometry data. *BMC Bioinformatics* **9**, 355 (2008).
15. Kleywegt, G.J. & Brunger, A.T. Checking your imagination: applications of the free R value. *Structure* **4**, 897-904 (1996).
16. Stivala, A., Wybrow, M., Wirth, A., Whisstock, J.C. & Stuckey, P.J. Automatic generation of protein structure cartoons with Pro-origami. *Bioinformatics* **27**, 3315-6 (2011).
